# Supplementary material for: Kraft lignin derived S and O co-doped porous graphene for metal-free benzylic alcohol oxidation
Source: Royal Society of Chemistry journal article supplement (doi:10.1039/c9cy02476j), 2020-01-01
Supplement: c9cy02476j1.pdf [file c9cy02476j1.pdf]

**Supplementary Information for**

**Kraft lignin derived S and O co-doped porous  
graphene for metal-free benzylic alcohol oxidation**

Shanhui Zhu,<sup>a,b,\*</sup> Yanyan Chen,<sup>a,b</sup> Xiaoqing Gao,<sup>a,c</sup> Zexiang Lv,<sup>a,c</sup> Yue He,<sup>a</sup> Jianguo

Wang,<sup>a</sup> and Weibin Fan<sup>a,\*</sup>

<sup>a</sup>State Key Laboratory of Coal Conversion, Institute of Coal Chemistry, Chinese  
Academy of Sciences, Taiyuan 030001, PR China.

E-mail: zhushanhui@sxicc.ac.cn; fanwb@sxicc.ac.cn

<sup>b</sup>These two authors were contributed equally.

<sup>c</sup>University of Chinese Academy of Sciences, Beijing 100039, People's Republic of  
China

## **1 Catalyst preparation**

### **1.1 Extract alkali metal ions from Kraft lignin**

0.2 g Kraft lignin was added into 100 mL water under vigorous stirring at 50 °C for 2 h. The sample was collected by washing and centrifugation, dried at 80 °C overnight, and pyrolyzed with the same procedure as above.

### **1.2 Extract organosolv lignin**

Organosolv lignin was extracted from hardwood locust based on the previous method.<sup>1</sup> The locust sawdust was provided by a local manufactory (ca. 40 mesh), and dried at 100 °C for 1 day prior to its use. 1.0 g locust sawdust, 30 mL ethanol and 30 mL water were loaded into a 0.1L high-pressure autoclave and heated at 180 °C for 5 h. Subsequently, a reddish-brown solution was collected by centrifugation, and solvent was separated by a rotary evaporator. Finally, the obtained organosolv lignin was dried at 80 °C overnight, and pyrolyzed with the same procedure as Kraft lignin.

### **1.3 Synthesis of conventional graphene and graphene oxide (GO)**

Conventional graphene was fabricated by rapid heating-up of GO under high vacuum, in which GO was synthesized from a modified Hummer's method described in our previous reports.<sup>2-3</sup> The as-prepared GO was sharply heated to 200 °C at a ramp rate of 30 °C/min under a pressure lower than 2.0 Pa. The layered graphene can be formed through the abrupt expansion.

## **2 Catalytic tests**

### **2.1 Reduction of nitrobenzene with 2-propanol to aniline**

0.5 mmol nitrobenzene, 8 mL 2-propanol, 3 mmol KOH and 0.05 g catalyst were

put into an autoclave. The reactor was purged into 0.1 MPa N<sub>2</sub> and heated at 120 °C for 24 hours. The procedure for product analysis was the same as benzyl alcohol oxidation.

## **2.2 Oxidative coupling of benzylamine**

0.05 g benzylamine, 0.05 g catalyst, 0.5 mmol KOH and 10 mL ethyl acetate were loaded into an autoclave. The reactor was purged into 0.5 MPa O<sub>2</sub> and heated at 120 °C for 10 hours. The same method for product analysis was used as above.

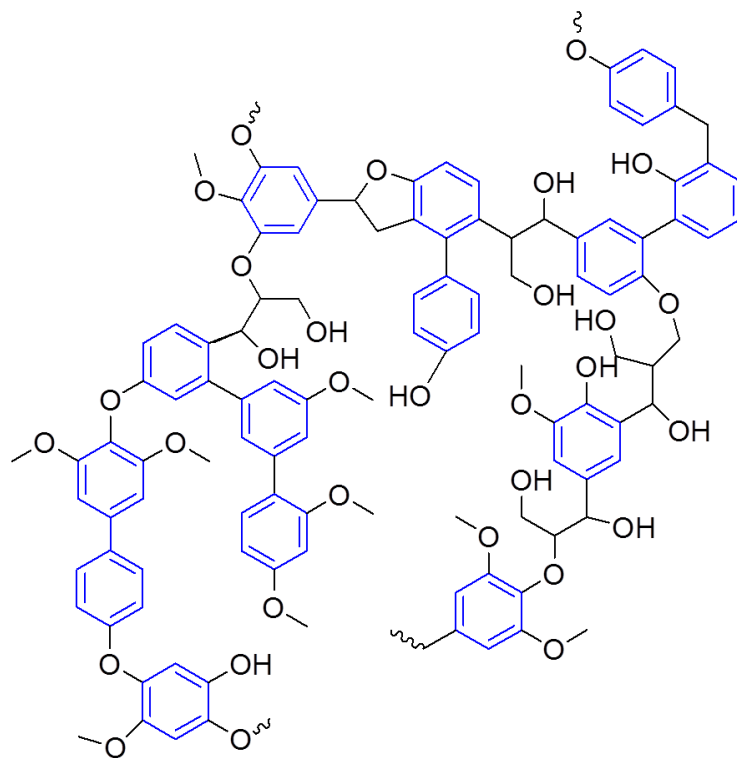

**Scheme S1** Chemical structure of lignin.

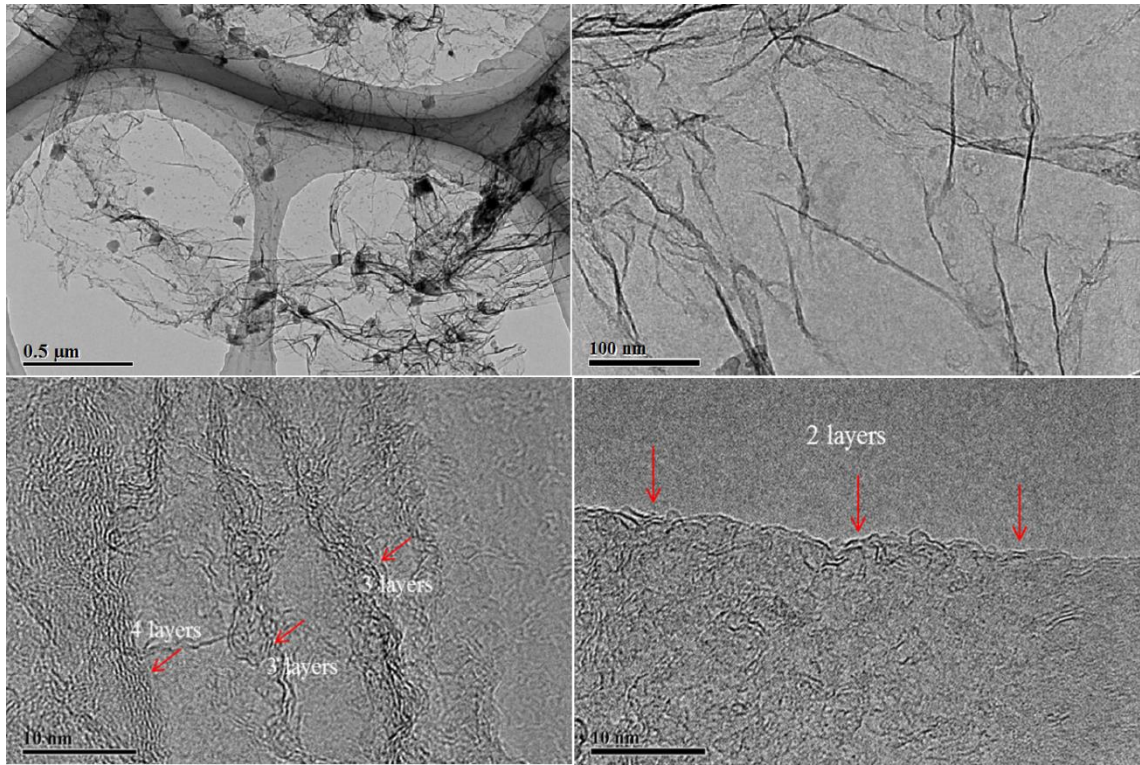

**Fig. S1** TEM and HRTEM images of G900.

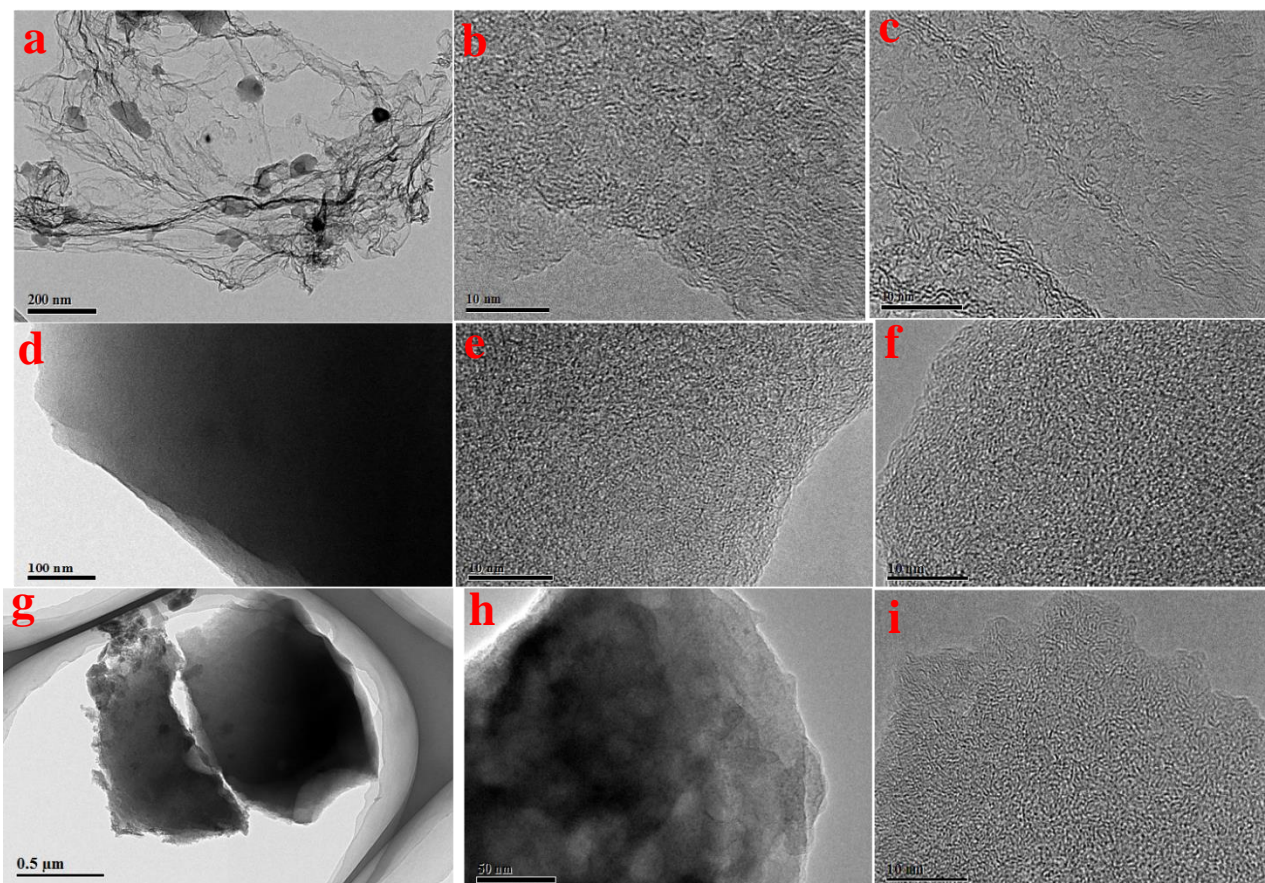

**Fig. S2** TEM and HRTEM images (a to c) of G800, (d to f) G700 and (g to i) G600.

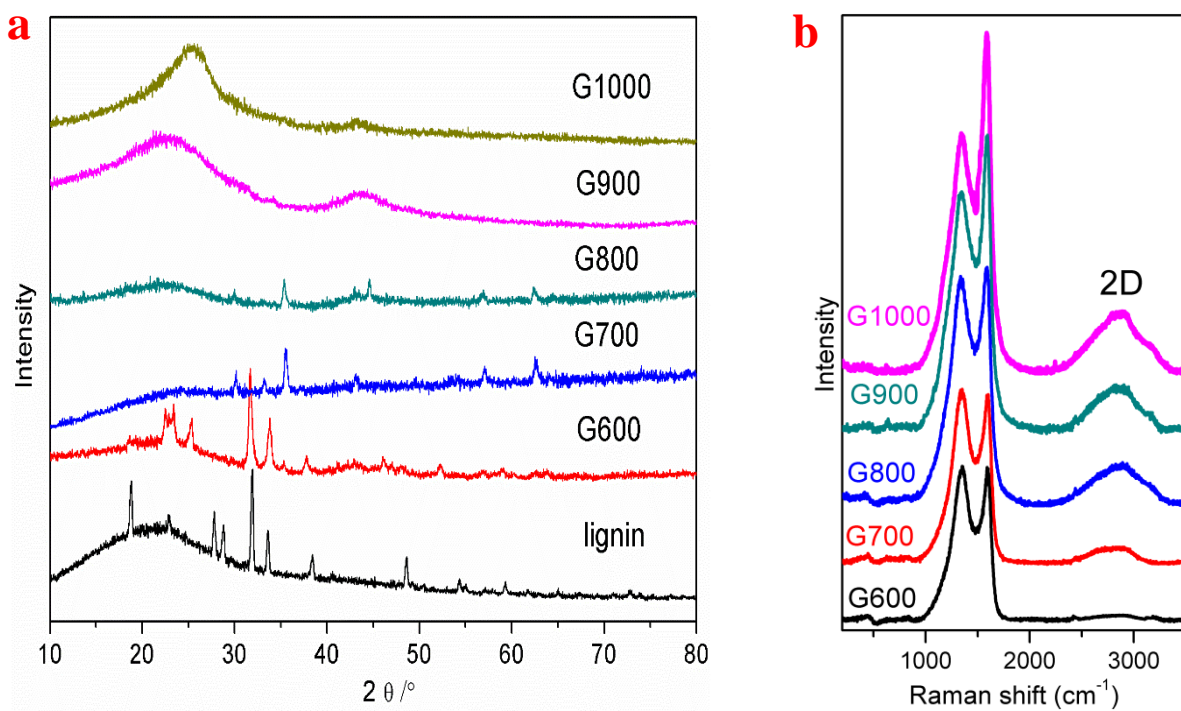

**Fig. S3** (a) XRD patterns of lignin and related carbon materials at various annealing temperature. (b) Raman spectra of various carbon materials. The horizontal axis is shortened to clearly observe the 2D peaks.

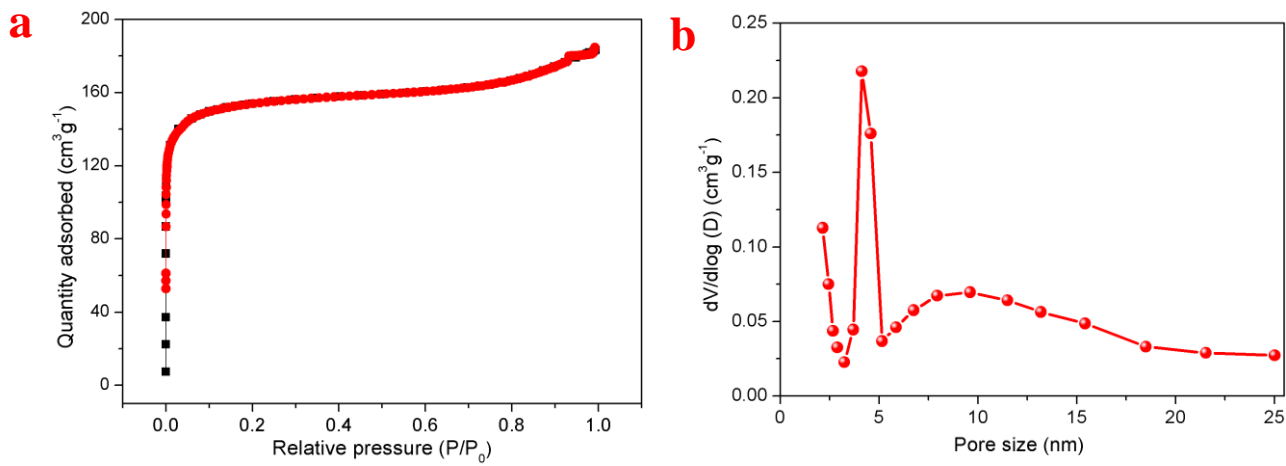

**Fig. S4** (a) N<sub>2</sub> adsorption-desorption isotherm and (b) pore size distribution of G1000.



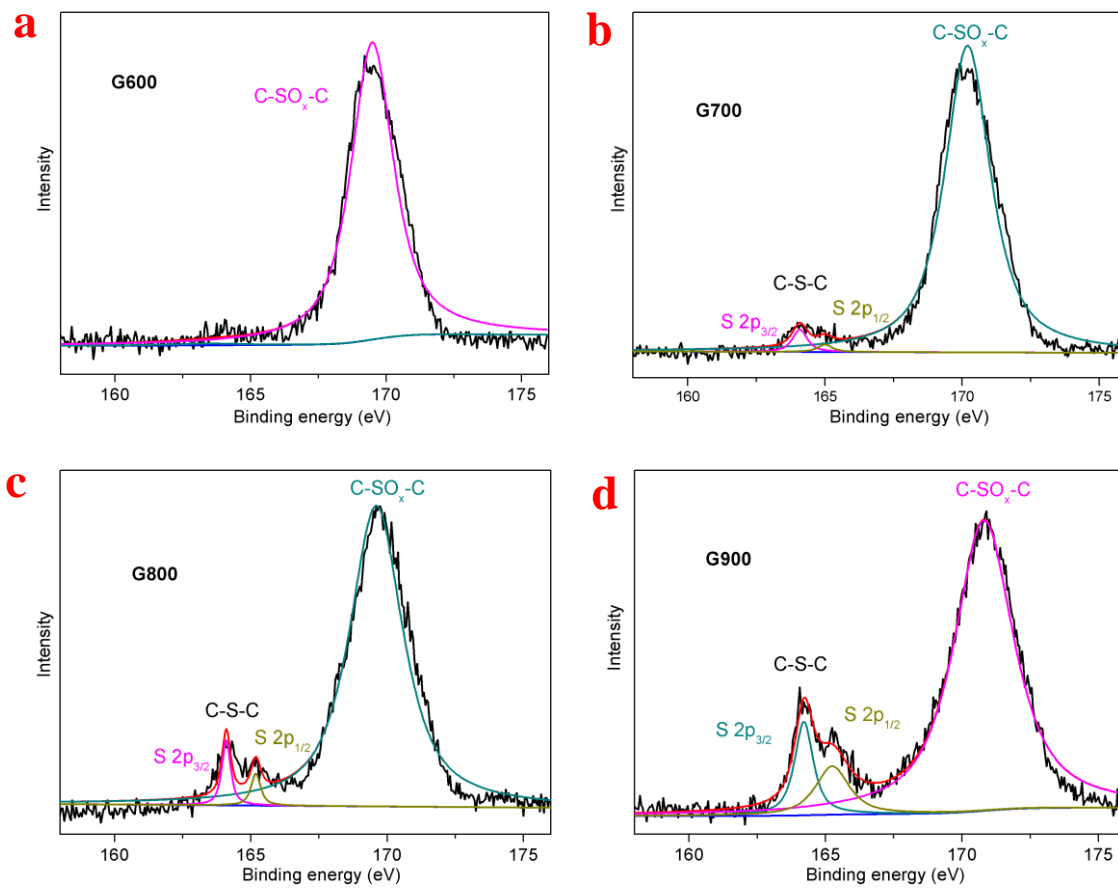

**Fig. S5** S 2p XPS peaks of (a) G600, (b) G700, (c) G800 and (d) G900.

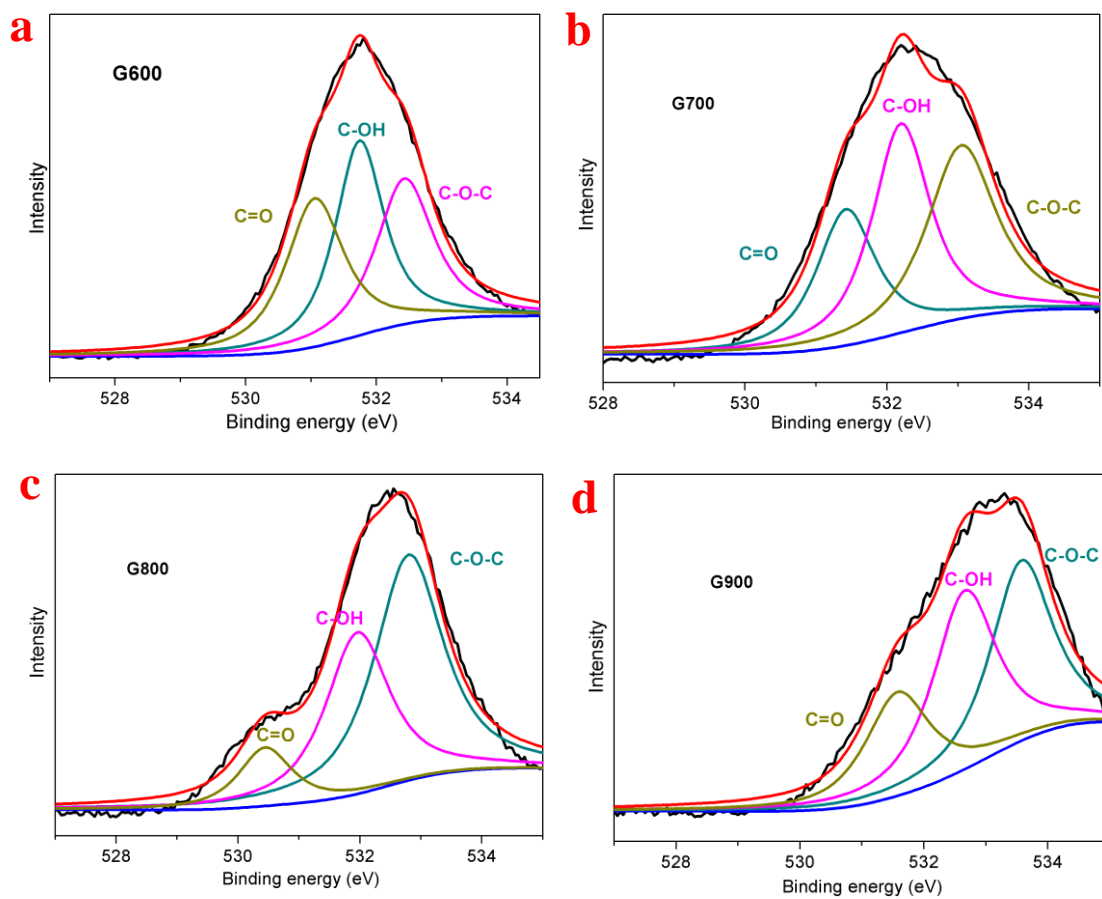

**Fig. S6** O 1s XPS peaks of G600 (a), G700 (b), G800 (c) and G900 (d).

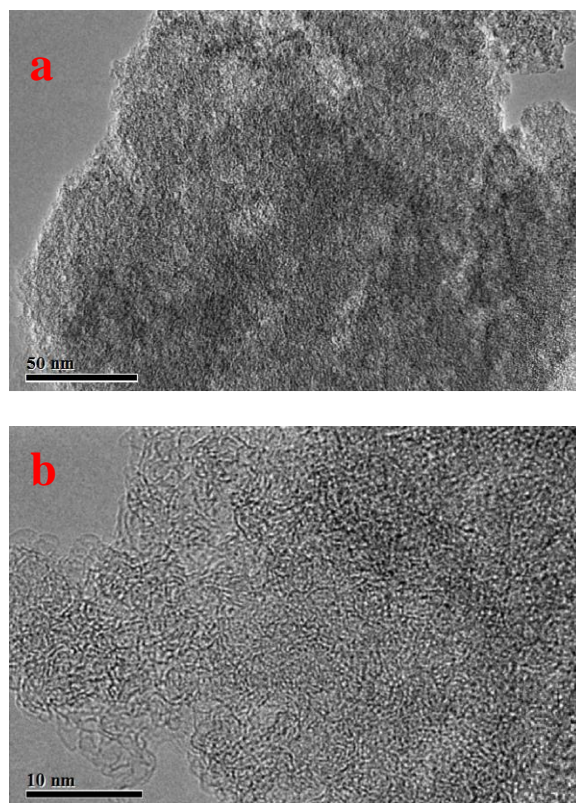

**Fig. S7** Extended TEM (a) and HRTEM (b) images for lignin pyrolysis at 250 °C for 2 h.

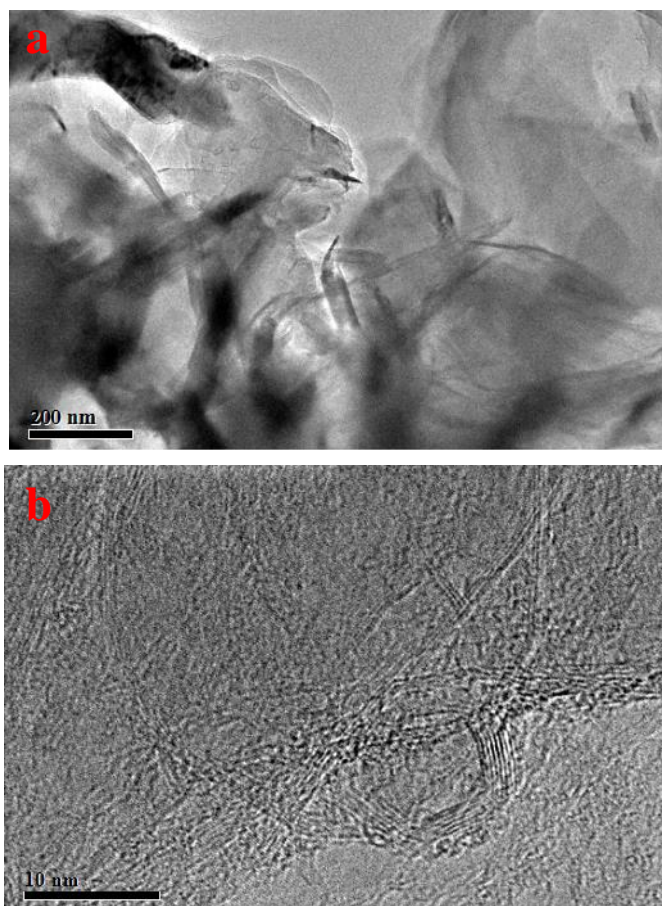

**Fig. S8** Extended TEM (a) and HRTEM (b) images for lignin pyrolysis from room temperature to 1000 °C

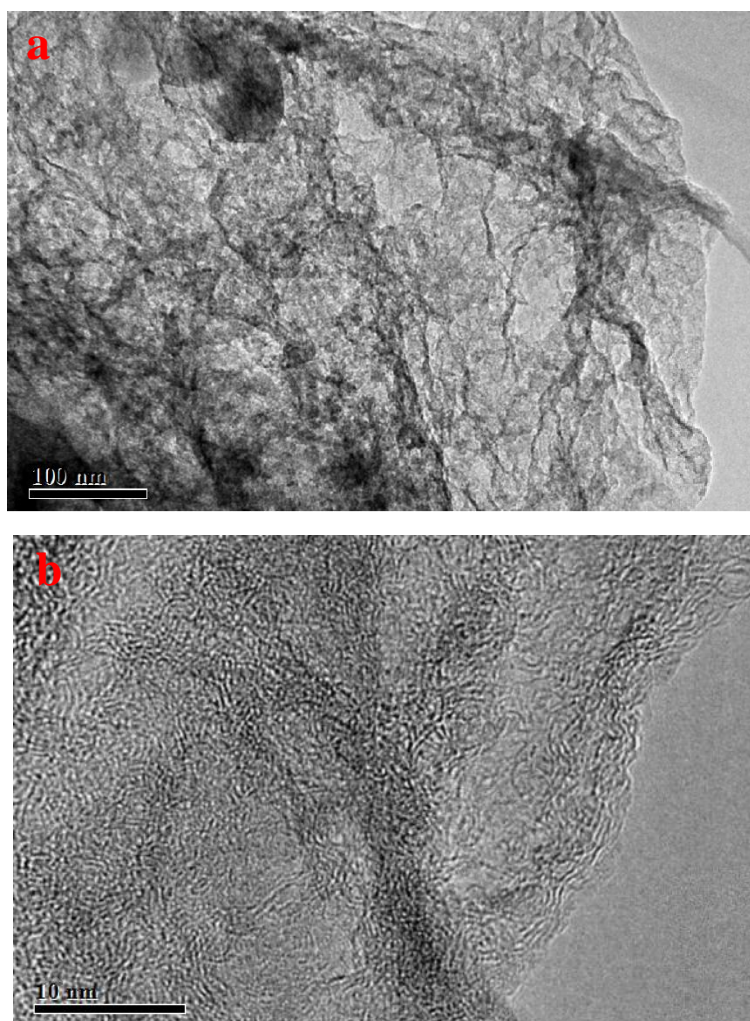

**Fig. S9** Extended TEM (a) and HRTEM (b) images for Kraft lignin pyrolysis at 1000 °C for 3 h.

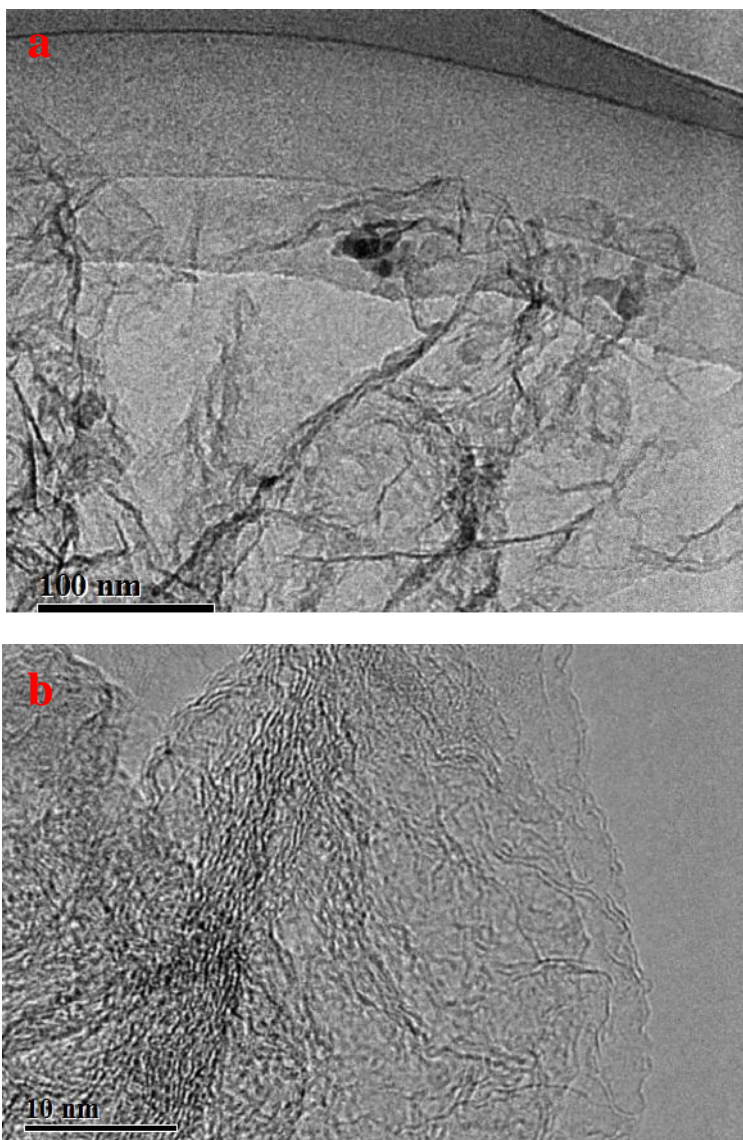

**Fig. S10** TEM (a) and HRTEM (b) images for annealing Kraft lignin after its washing.

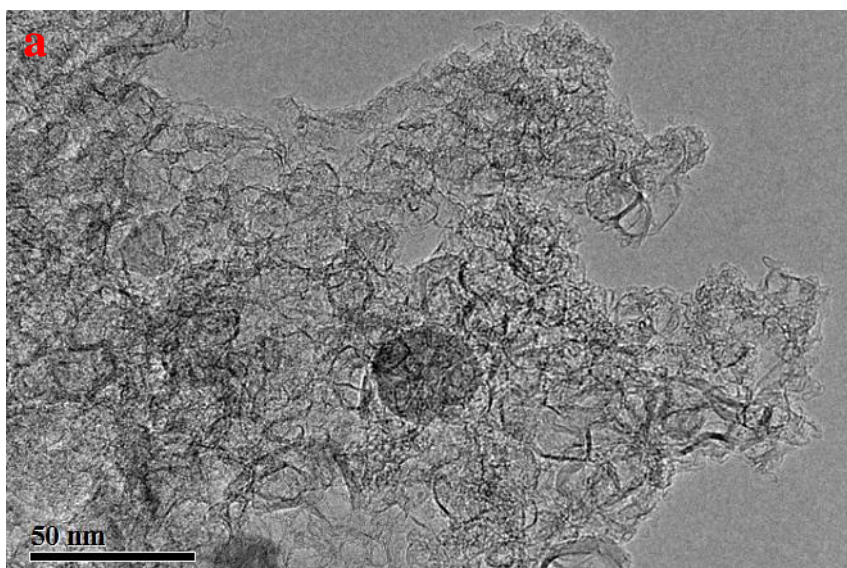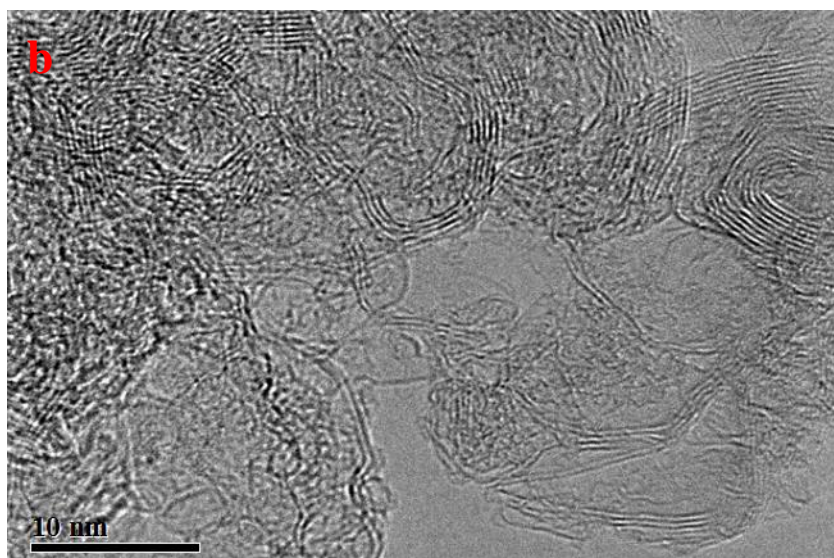

**Fig. S11** TEM (a) and HRTEM (b) images for annealing organosolv lignin.

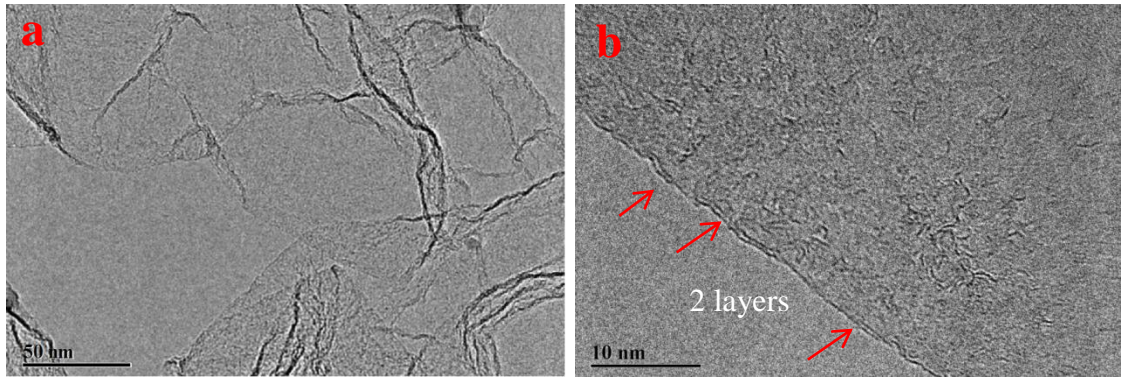

**Fig. S12** TEM and HRTEM images of spent G1000.



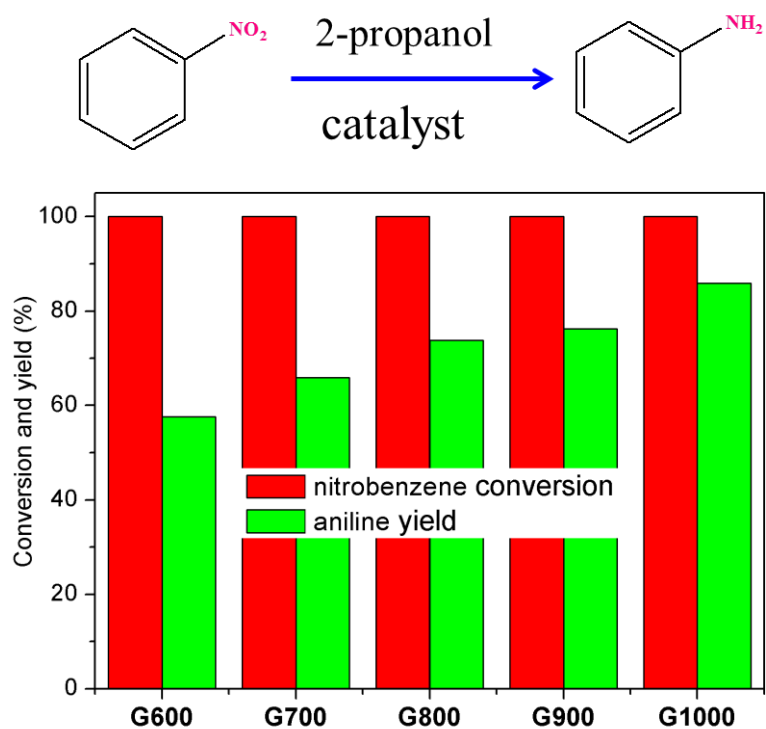

**Fig. S13** Catalytic performance for nitrobenzene reduction with 2-propanol to aniline over G1000. Reaction conditions: 0.5 mmol nitrobenzene, 0.05 g catalyst, 3 mmol KOH, 8 mL 2-propanol, 120 °C, 24 h, 0.1 MPa  $\text{N}_2$ .

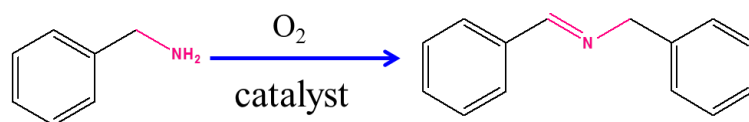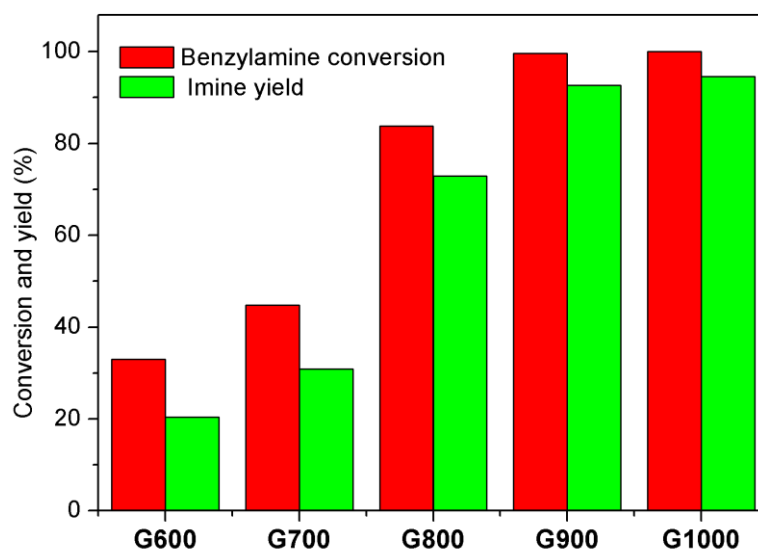

**Fig. S14** Catalytic performance for oxidative coupling benzylamine to imine over G1000. Reaction conditions: 0.05 g benzylamine, 0.05 g catalyst, 0.5 mmol KOH, 10 mL ethyl acetate, 120 °C, 10 h, 0.5 MPa O<sub>2</sub>.

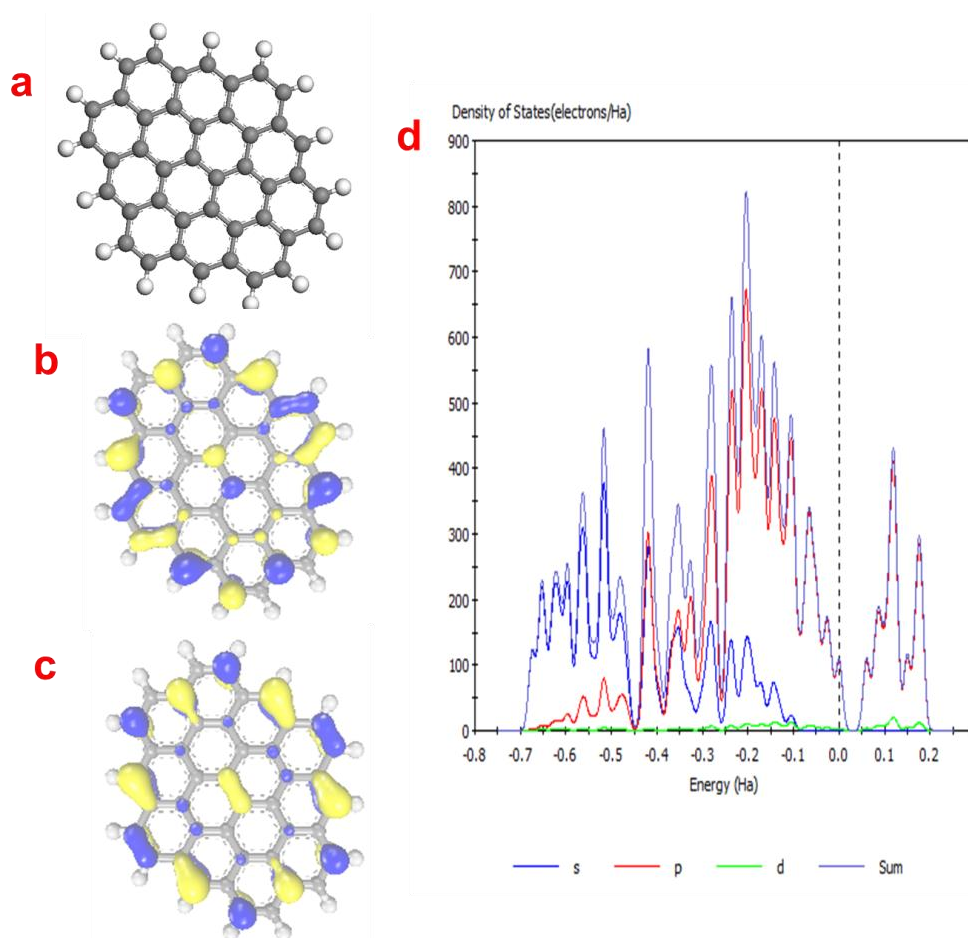

**Fig. S15** (a) Optimised graphene model for DFT calculation. (b) HOMO shape; (c) LOMO shape (d) PDOS plots of graphene.

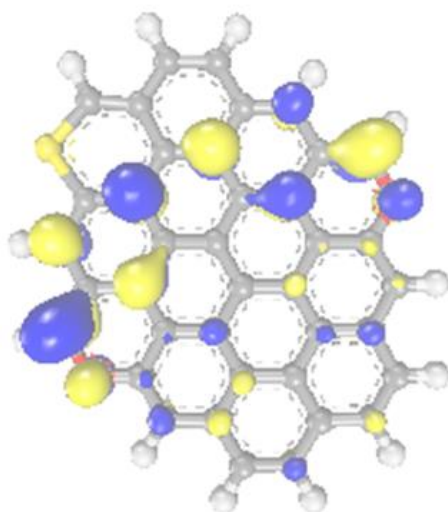

**Fig. S16** HOMO shape of S and O co-doped graphene.

**Table S1** Textural properties of various carbon materials.

| catalyst | surface area<br>(m <sup>2</sup> g <sup>-1</sup> ) | Micropore surface area<br>(m <sup>2</sup> g <sup>-1</sup> ) | Pore size<br>(nm) | Pore volume<br>(cm <sup>3</sup> g <sup>-1</sup> ) | Micropore volume<br>(cm <sup>3</sup> g <sup>-1</sup> ) |
|----------|---------------------------------------------------|-------------------------------------------------------------|-------------------|---------------------------------------------------|--------------------------------------------------------|
| G600     | 273.8                                             | 178.3                                                       | 3.8               | 0.034                                             | 0.085                                                  |
| G700     | 295.2                                             | 209.6                                                       | 4.1               | 0.042                                             | 0.108                                                  |
| G800     | 321.1                                             | 235.2                                                       | 4.7               | 0.062                                             | 0.115                                                  |
| G900     | 441.6                                             | 263.7                                                       | 5.2               | 0.073                                             | 0.120                                                  |
| G1000    | 524.5                                             | 327.8                                                       | 5.8               | 0.079                                             | 0.133                                                  |

**Table S2** The catalytic performance of G1000 and reported carbon-based catalysts in benzyl alcohol oxidation to benzaldehyde.

| Catalysts             | Oxidant                           | Reaction temperature (°C) | O <sub>2</sub> pressure (MPa) | Reaction time (h) | Conversion (%) | Selectivity (%) | Yield (%) | References |
|-----------------------|-----------------------------------|---------------------------|-------------------------------|-------------------|----------------|-----------------|-----------|------------|
| nanoshell carbon      | O <sub>2</sub> + HNO <sub>3</sub> | 90                        | 0.1                           | 5                 | 96             | 92              | 88.3      | 4          |
| carbon nanotube       | O <sub>2</sub> + HNO <sub>3</sub> | 90                        | 0.1                           | 5                 | 96.2           | 88.3            | 84.9      | 5          |
| carbon nanotube       | O <sub>2</sub>                    | 130                       | 1.5                           | 10                | 24.1           | 89.5            | 21.6      | 6          |
| N-doped graphene      | O <sub>2</sub>                    | 70                        | 0.1                           | 10                | 12.8           | 100             | 12.8      | 7          |
| graphene oxide        | air                               | 150                       | 0.1                           | 24                | 97             | 87.6            | 85        | 8          |
| 50 wt% P-doped carbon | O <sub>2</sub>                    | 100                       | 0.1                           | 24                | 56.1           | 95.7            | 53.7      | 9          |
| graphene              | O <sub>2</sub>                    | 120                       | 0.5                           | 5                 | 25.5           | 95.8            | 24.4      | this work  |
| G1000                 | O <sub>2</sub>                    | 120                       | 0.5                           | 5                 | 99.2           | 96.7            | 95.9      | this work  |

## References

- 1 P. Ferrini and R. Rinaldi, *Angew. Chem, Int. Ed.*, 2014, **53**, 8634-8639.
- 2 S. Zhu, Y. Cen, M. Yang, J. Guo, C. Chen, J. Wang and W. Fan, *Appl. Catal. B: Environ.*, 2017, **211**, 89-97.
- 3 S. Zhu, C. Chen, Y. Xue, J. Wu, J. Wang and W. Fan, *ChemCatChem*, 2014, **6**, 3080-3083.
- 4 Y. Kuang, N. M. Islam, Y. Nabae, T. Hayakawa and M.-a. Kakimoto, *Angew. Chem. Inter. Ed.*, 2010, **49**, 436-440.
- 5 J. Luo, F. Peng, H. Yu and H. Wang, *Chem. Eng. J.*, 2012, **204-206**, 98-106.
- 6 J. Luo, H. Yu, H. Wang, H. Wang and F. Peng, *Chem. Eng. J.*, 2014, **240**, 434-442.
- 7 J. Long, X. Xie, J. Xu, Q. Gu, L. Chen and X. Wang, *ACS Catal.*, 2012, **2**, 622-631.
- 8 D. R. Dreyer, H. P. Jia and C. W. Bielawski, *Angew. Chem. Inter. Ed.*, 2010, **49**, 6813-6816.
- 9 M.A. Patel, F. Luo, M.R. Khoshi, E. Rabie, Q. Zhang, C.R. Flach, R. Mendelsohn, E. Garfunkel, M. Szostak and H. He, *ACS Nano*, 2016, **10**, 2305-2315.
